# Supplementary material for: MTHFR 677 C&lt; T and 1298 A&gt;C polymorphisms increases the risk of recurrent abortion in the Iraqi woman
Source: Research Square preprint supplement (doi:10.21203/rs.3.rs-480746/v1), 2021-05-03
Supplement: Supplementary file 1 [file f113ead9c52e892c6e214a8f.docx]

Nature Journal

**Nature Journal**

**Study of MTHFR 677 C< T and 1298 A>C polymorphisms**

**Enzyme as risk factors for multiple abortion in the Iraqi woman**

Dr. Emad Salaam Abood1, Dr. Maryam Sabah2

1 Medical physics department, Hilla University College, Babylon, Iraq

2 Medical laboratory department, Hilla University College, Babylon, Iraq

**Principle of Methods**

1. **VIDAS®** instruments represent one of the broadest installed bases of benchtop immunoanalyzers in the world. The success of the brand is based on the quality of its reagents and the robustness and ease of use of its instruments, associating the single-test concept with ELFA technology. The comprehensive VIDAS® menu offers more than 100 parameters to allow clinicians to make the right treatment decisions.

S.N: of VIDAS instrument (IVD7001732).

Location: Alburaq medical laboratory, Najaf, Iraq.

Test work in this research: (CMV IgG,IgM and Rubella IgG, IgM).

1. **CTK Biotic, Inc**. the OnSite Toxo IgG/IgM Combo Rapid Test is a lateral flow chromatographic immunoassay for the simultaneous detection and differentiation of IgG and IgM anti-Toxoplasma gondii (T. gondii) in human serum, plasma or whole blood.

RFE: R0234C.

Location: Alburaq medical laboratory, Najaf, Iraq.

Test work in this research: (TOXO IgG, IgM).

1. **AESKULISA® ELISA Test Kits** The AESKULISA® product line comprises ELISA assays for all major autoimmune disease groups - from routine to research application. Offering more than 140 Kits, AESKU.DIAGNOSTICS has one of the widest portfolios of ELISA assays worldwide.

LOT: A17490252

LOT: WB 18241

Location: Alburaq medical laboratory, Najaf, Iraq.

1. Test work in this research: (Protein C and Protein S).
2. **Stago** Since 1962, Stago has dedicated its entire resources to developing the single field of coagulation. Permanently attuned to the medical and scientific communities, Stago is actively interested in all advances in this domain and in all the implications of such progress. Through this strategic approach, the company now has many major patents and innovations. With more than 350 coagulation products, Stago offers a wide product portfolio through its highly effective commercial network (subsidiaries and distributors) and is a market leader in its field.

Location: Alburaq medical laboratory, Najaf, Iraq.

Test work in this research: (Lupus).

1. **Alegria argentic** ORGENTEC Diagnostika, one of the worldwide leading manufacturers in the diagnostic market for autoimmune diseases, was awarded with the Medical Design Excellence Awards® (MDEA) 2005 for developing the new and highly innovative diagnostic instrument Alegria®.

Alegria® is a "Random Access" ELISA Analyser for the field of in–vitro-diagnostics. The analyse system is developed for SMC® Technology processes, which are based on test strips for the diagnostic use of autoimmune diseases.

The principle of Alegria® and the especially developed SMC® Technology is based on a simplification of laboratory diagnostic, which allows selected and patient specific diagnosis. This individually optimized form of diagnosis makes a fast and individual handling of patient samples in laboratories possible. This results in a significant cost reduction which is finally beneficial for the whole health care system. At last, the general public but also every single patient benefits of the fast diagnostic finding, which allows contemporarily starting with the appropriate therapy.

REF: ORG 300-00

SN: 492000

Location: Alburaq medical laboratory, Najaf, Iraq.

Test work in this research: (ACA IgG, IgM and APL IgG, IgM).

1. **QIAGEN QIAamp DNA Blood Extraction**

GTIN: 04053228005872

LOT: 163048160

REF: 51106

And

GTIN: 04053228005872

LOT: 160043869

REF: 51106

Location: Alburaq medical laboratory, Najaf, Iraq.

Test work in this research: (DNA Extraction).

1. **VIENNA LAB**

LOT: 10-ZW-20-039

REF: 4-240

And

LOT: 10-NE-19-039

REF: 4-240

And

LOT: 04- -51-18-039

REF: 4-240

And

LOT: 20-51-19-039

REF: 4-240

Location: Alburaq medical laboratory, Najaf, Iraq.

Test work in this research: (MTHFR Mutation).

1. **Thermo fisher**

**A. Scientific PCR Thermal Cycler**

REF: A73028

SN: 2280418091255

Location: Alburaq medical laboratory, Najaf, Iraq.

Test work in this research: (PCR).

**B. Taq Polymers**

**LOT: 00434514 5U/uL**

**LOT:00468843 5U/uL**

Location: Alburaq medical laboratory, Najaf, Iraq.

Test work in this research: (PCR).

**C. Hot plate**

CAT NO: 88880030

Model: Digital cooling dry-bath

S.N: 14KT30011

Location: Alburaq medical laboratory, Najaf, Iraq.

Test work in this research: (DNA Extraction).

**D. Vortex**

CAT NO: 88880018

Model: LP Vortex Mixer

S.N: IBKT18093

Location: Alburaq medical laboratory, Najaf, Iraq.

Test work in this research: (DNA Extraction).

1. **EPPENDORF pipette**
2. **0.5 – 10 ul (O40251H)**
3. **10 – 100 ul (O15590H)**
4. **100 – 1000 ul (O31663H)**
5. **AXYGEN (Tips)**

**Certified RNase/DNase & pyrogen safe**

1. **10 ul**
2. **100 ul**
3. **1000 ul**
